# Supplementary material for: ‘Practice what you preach’. Perspectives on the involvement of people with dementia and carers in community-based dementia friendly initiatives, a qualitative study
Source: Frontiers journal article supplement (doi:10.3389/fpsyt.2024.1387536), 2024-05-16
Supplement: Presentation_2.pdf [file Presentation_2.pdf]

## ***Supplementary Material: Overview of themes and subthemes***

### **‘Practice what you preach’. Perspectives on the involvement of people with dementia and carers in community based dementia friendly initiatives, a qualitative study.**

Authors: Marjolein Thijssen\* <sup>1,2,3</sup>, Linda Dauwerse<sup>4</sup>, Frans Lemmers<sup>5</sup>, Ria Nijhuis-van der Sanden<sup>1†</sup>, Ramon Daniels<sup>6 †</sup>, Maud Graff <sup>1,2†</sup>, Wietske Kuijer-Siebelink <sup>7,8</sup>.

|   | <b>Themes</b>                                                                                                                               | <b>Subthemes</b>                                                                                                              |
|---|---------------------------------------------------------------------------------------------------------------------------------------------|-------------------------------------------------------------------------------------------------------------------------------|
| 1 | the involvement of people with dementia and their carers is important for both people with dementia and their carers and other stakeholders | Involvement of the target group in DFI is important so that the target group has a good time and feels heard and seen.        |
| 2 | personal character traits, life histories and associated emotions evoke the need for involvement                                            | Personal character traits of the person                                                                                       |
|   |                                                                                                                                             | Personal experiences with emotional impact influence attitudes towards involvement and participation                          |
|   |                                                                                                                                             | Personal experiences of impact regarding enabling involvement or having a say.                                                |
| 3 | involvement requires an open, responsive stance and building relationships                                                                  | Ask and listen, sit with pwd to increase involvement and participation. Questioning carers of people with dementia.           |
|   |                                                                                                                                             | That you make room in your agenda and working method for people with dementia and their carers                                |
|   |                                                                                                                                             | Space that is felt by people with dementia to be able to say what you think and feel and/or to act according to how you feel. |
|   |                                                                                                                                             | Emotions regarding dementia influences expressing needs/opinions                                                              |
|   |                                                                                                                                             | Personal choices regarding activities influence the extent to which carer wants to be involved                                |
| 4 | the estimation of one's own and others' capacities influences perspectives on involvement.                                                  | Reflection on own capacities and capabilities by professionals and volunteers                                                 |
|   |                                                                                                                                             | Estimation of capacities of people with dementia and carers                                                                   |
